# Supplementary material for: Efficacy of Antiangiogenic Drugs in the Treatment of Diabetic Macular Edema: A Bayesian Network Analysis
Source: Front Pharmacol. 2021 Apr 15;12:637667. doi: 10.3389/fphar.2021.637667 (PMC8082725; doi:10.3389/fphar.2021.637667)
Supplement: Supplementary file 2 [file datasheet2.xlsx]

## Sheet: Sheet1
	STUDY	treatment	mean	sd	size	treatment	mean	sd	size
BCVA 3M	paccola 2007	Bevacizumab	-0.08	0.83	13	Triamcinolone	-0.2	0.72	13
	Wang 2009	Triamcinolone	0.28	0.53	12	Sham injections	-0.01	0.27	12
	Ma 2010	Triamcinolone	0.24	0.34	30	Bevacizumab	0.14	0.23	30
	Marey 2011	Triamcinolone	0.02	0.17	30	Bevacizumab	0.06	0.24	30
	Lim 2012	Bevacizumab	-0.09	0.46	38	Triamcinolone	-0.24	0.36	37
	Yan 2016	Ranibizumab	10.9	50.35	40	Triamcinolone	5.2	45.65	40
	Xue 2016	Ranibizumab	0.239	0.5	40	Triamcinolone	0.089	0.36	40
	Zhou 2016	Ranibizumab	-0.64	0.26	20	Triamcinolone	-0.62	0.31	21
	Riazi-Esfahani 2017	Bevacizumab	-0.1	0.16	46	Bevacizumab+Triamcinolone	-0.08	0.2	46
	Fouda 2017	Aflibercept	0.18	0.3	35	Ranibizumab	0.15	0.29	35
	Baghi 2017	Aflibercept2.5	-0.25	0.26	42	Aflibercept 1.25	-0.36	0.27	42	Bevacizumab	-0.3	0.31	39
	Bao 2017	Ranibizumab	2.51	6.46	30	Ranibizumab+Triamcinolone	5.62	9.33	30
	Li 2018	Ranibizumab	0.29	0.28	51	Triamcinolone	0.24	0.25	51
	Ren 2019	Ranibizumab	19.23	72.1	30	Triamcinolone	19.51	72.1	30
	Rodrigues 2020	Bevacizumab	0	0.46	32	Triamcinolone	0	0.6	28
BCVA 6M	Jonas 2006	Triamcinolone	0.03	0.72	27	Sham injections	0	0	11
	paccola 2007[	Bevacizumab	-0.03	0.88	13	Triamcinolone	-0.02	0.89	13
	Ma 2010	Triamcinolone	0.05	0.17	30	Bevacizumab	0.07	0.2	30
	Lim 2012	BevacizumabevacizumaBevacizumab	-0.04	0.51	38	Triamcinolone	-0.21	0.39	37
	Masoud 2012	BevacizumabevacizumaBevacizumab	-0.21	0.22	50	BevacizumabevacizumaBevacizumab+Triamcinolone	-0.1	0.28	50
	Yaseri 2014	BevacizumabevacizumaBevacizumab	-0.22	0.14	8	BevacizumabevacizumaBevacizumab+Triamcinolone	-0.01	0.24	11
	Riazi-Esfahani 2017	Bevacizumab	-0.13	0.17	46	Bevacizumab+Triamcinolone	-0.09	0.16	46
	Fouda 2017	Aflibercept	0.2	0.33	35	Ranibizumab	0.23	0.36	35
	Li 2018	Ranibizumab	0.26	0.24	51	Triamcinolone	0.17	0.173	51
	Ji 2019	Conbercept	8.52	44.4	60	Triamcinolone	4.01	35.5	60
	Rodrigues 2020	Bevacizumab	0	0.46	32	Triamcinolone	0	0.6	28
BCVA 12M	Wang 2009	Triamcinolone	0.1	0.37	12	Sham injections	-0.08	0.21	12
	Massin 2010	Ranibizumab	10.3	9.1	51	Sham injections	-1.4	14.2	49
	Lim 2012	Bevacizumab	-0.16	0.4	38	Triamcinolone	-0.16	0.43	37
	Masoud 2012	Bevacizumab	-0.21	0.27	50	Bevacizumab+Triamcinolone	-0.1	0.27	50
	Ekinci 2014	Triamcinolone	0.16	0.34	30	Ranibizumab	0.15	0.35	30
	Fouda 2017	Aflibercept	0.25	0.37	35	Ranibizumab	0.19	0.32	35
	Jabbarpoor 2018	Aflibercept 2.5	-0.33	0.26	42	Aflibercept 1.25	-0.38	0.34	42	Bevacizumab	-0.26	0.35	39
	Rodrigues 2020	Bevacizumab	0	0.46	32	Triamcinolone	0	0.6	28
CMT 3M	paccola 2007[	Bevacizumab	-30.92	422.68	13	Triamcinolone	-121.89	301.5	13
	Ma 2010	Triamcinolone	-276.87	270.31	30	Bevacizumab	-252.34	295.52	30
	Marey 2011	Triamcinolone	-20.77	417.59	30	Bevacizumab	-61.23	341.1	30
	Lim 2012	Bevacizumab	-129	291.32	38	Triamcinolone	-144	272.63	37
	Sonoda 2014	Triamcinolone	-114.5	337.55	25	Bevacizumab	-46	389.66	26
	Xue 2016	Ranibizumab	-227.21	263.12	40	Triamcinolone	-141.45	334.86	40
	Zhou 2016	Ranibizumab	-140	308.55	20	Triamcinolone	-123.06	327.36	21
	Riazi-Esfahani 2017	Bevacizumab	-91	107	46	Bevacizumab+Triamcinolone	-91	118	46
	Fouda 2017	Aflibercept	-94.75	336.62	35	Ranibizumab	-77.2	359.48	35
	Baghi 2017	Aflibercept2.6	-108	108	42	Aflibercept 1.26	-99	141	42	Bevacizumab	-99	130	39
	Bao 2017	Ranibizumab	-200.79	245.86	30	Ranibizumab+Triamcinolone	-332.5	134.19	30
	Li 2018	Ranibizumab	-310.17	238.89	51	Triamcinolone	-281.64	246.64	51
	Ren 2019	Ranibizumab	-408.7	202.89	30	Triamcinolone	-410.9	201.9	30
	Rodrigues 2020	Bevacizumab	-44.8	392.6	32	Triamcinolone	-25.6	441.7	28
CMT 6M	paccola 2007[	Bevacizumab	-16.14	440.34	13	ITriamcinolone	-42.22	381.7	13
	Ma 2010	Triamcinolone	-142.93	382.34	30	Bevacizumab	-54.69	498.99	30
	Lim 2012	Bevacizumab	-90	319.48	38	Triamcinolone	-120	290.28	37
	Masoud 2012	Bevacizumab	-36	119	50	Bevacizumab+Triamcinolone	-25	108	50
	Yaseri 2014	Bevacizumab	-86	172	8	Bevacizumab+Triamcinolone	10	115	11
	Pan 2016	Ranibizumab	-276.8	186.72	39	Triamcinolone	-146.1	319.36	39
	Riazi-Esfahani 2017	Bevacizumab	-102	108	46	Bevacizumab+Triamcinolone	-99	110	46
	Fouda 2017	Aflibercept	-73.59	356.63	35	Ranibizumab	-111.4	329.27	35
	Ji 2017	Ranibizumab	-149.48	352.2	116	Ranibizumab+Triamcinolone	-208.06	288.3	119
	Li 2018	Ranibizumab	-335.09	219.92	51	Triamcinolone	-250.76	283.3	51
	Rodrigues 2020	Bevacizumab	-33.6	401.01	32	Triamcinolone	-14.5	451.43	28
CMT 12M	Lim 2012	Bevacizumab	-179	239.72	38	Triamcinolone	-200	220.6	37
	Masoud 2012	Bevacizumab	-40	133	50	Bevacizumab+Triamcinolone	-10	145	50
	Ekinci 2014	Triamcinolone	-141.5	300.65	30	Ranibizumab	-150.5	297.84	30
	Fouda 2017	Aflibercept	-104.49	326.5	35	Ranibizumab	-84.2	351.72	35
	Jabbarpoor 2018	Aflibercept 2.6	-125	125	42	Aflibercept 1.26	-131	141	42	Bevacizumab	-113	139	39
	Rodrigues 2020	Bevacizumab	-77.3	358.82	32	Triamcinolone	-52	413.57	28
IOP 3M	paccola 2007[	Bevacizumab	0.08	13.87	13	Triamcinolone	0.17	14.79	13
	Ma 2010	Triamcinolone	2.27	14.32	30	Bevacizumab	1.4	15.13	30
	Marey 2011	Triamcinolone	0.2	14.1	30	Bevacizumab	-0.34	14.15	30
	Bao 2017	Ranibizumab	-7.08	16.2	30	Ranibizumab+Triamcinolone	-12.17	11.47	30
	Li 2018	Ranibizumab	-1.32	13.53	51	Triamcinolone	4.9	17.35	51
	Ren 2019	Ranibizumab	4.3	18.6	30	Triamcinolone	4.23	18.57	30
	Rodrigues 2020	Bevacizumab	0.8	19.15	32	Triamcinolone	1.1	19.3	28
IOP 6M	Jonas 2006	Triamcinolone	2.4	15.4	27	Sham injections	-1.4	12.5	11
	paccola 2007[	Bevacizumab	0.33	14.08	13	Triamcinolone	0.67	15.24	13
	Ma 2010	Triamcinolone	1.58	14.01	30	Bevacizumab	0.97	14.22	30
	Pan 2016	Ranibizumab	-2.4	9.44	39	Triamcinolone	-2.4	9.58	39
	Li 2018	Ranibizumab	-3.83	11.1	51	Triamcinolone	3.79	16.3	51
	Rodrigues 2020	Bevacizumab	1.1	19.4	32	Triamcinolone	1.1	19.3	28
